# Supplementary material for: The Ecological Niche of SARS-CoV-2-like Viruses in Bats, as Inferred from Phylogeographic Analyses of Rhinolophus Species
Source: Preprints.org preprint supplement (doi:10.20944/preprints202103.0409.v1), 2021-03-16
Supplement: Supplementary file 2 [file supplementary]

**Table S2. Geographic records used to infer the ecological niche of bat SARS-CoV-like viruses**

| Country | locality              | Latitude | Longitude | References |
|---------|-----------------------|----------|-----------|------------|
| China   | Guangdong             | 22.65334 | 113.05734 | [1,2]      |
| China   | Guangxi, Nanning      | 22.81700 | 108.36653 | [1,3]      |
| China   | Guizhou, Anlong       | 25.09900 | 105.44269 | [4]        |
| China   | Hebei                 | 38.71913 | 114.80067 | [1,2]      |
| China   | Henan, Jiyuan         | 35.06725 | 112.60192 | [1,4]      |
| China   | Hong Kong             | 22.37425 | 114.08477 | [5]        |
| China   | Hong Kong             | 22.42819 | 114.06778 | [5]        |
| China   | Hubei, Yichang        | 30.69197 | 111.28647 | [3]        |
| China   | Jilin, Tonghua county | 41.67981 | 125.75925 | [1,6]      |
| China   | Shaanxi               | 33.99589 | 107.48343 | [1,2]      |
| China   | Shanxi                | 37.27425 | 111.24516 | [1,2]      |
| China   | Yunnan, Baoshan       | 25.11206 | 99.16175  | [7]        |
| China   | Yunnan, Kunming       | 24.88008 | 102.83289 | [7-9]      |
| China   | Yunnan, Lufeng        | 25.15011 | 102.07903 | [10]       |
| China   | Yunnan, Mangshi       | 24.43369 | 98.58808  | [11]       |
| China   | Yunnan, Menglian      | 22.32911 | 99.58417  | [6]        |
| China   | Zhejiang, Longquan    | 28.07464 | 119.14147 | [4]        |
| China   | Zhejiang, Daishan     | 30.26671 | 122.22394 | [1,12]     |
| Korea   | Jeongbuk              | 35.42772 | 127.13625 | [13,14]    |

## References

1. Wu, Z.; Yang, L.; Ren, X.; He, G.; Zhang, J.; Yang, J.; Qian, Z.; Dong, J.; Sun, L.; Zhu, Y.; et al. Deciphering the bat virome catalog to better understand the ecological diversity of bat viruses and the bat origin of emerging infectious diseases. *The ISME journal*, **2016**, *10*, 609-620. doi:10.1038/ismej.2015.138
2. Fan, Y.; Zhao, K.; Shi, Z. L.; Zhou, P. Bat Coronaviruses in China. *Viruses*, **2019**, *11*, 210. doi:10.3390/v11030210
3. Li, W.; Shi, Z.; Yu, M.; Ren, W.; Smith, C.; Epstein, J. H.; Wang, H.; Crameri, G.; Hu, Z.; Zhang, H.; et al. Bats are natural reservoirs of SARS-like coronaviruses. *Science*, **2005**, *310*, 676-679. doi:10.1126/science.1118391
4. Lin, X.D.; Wang, W.; Hao, Z.Y.; Wang, Z.X.; Guo, W.P.; Guan, X.Q.; Wang, M.R.; Wang, H.W.; Zhou, R.H.; Li, M.H.; et al. Extensive diversity of coronaviruses in bats from China. *Virology*, **2017**, *507*, 1-10. doi:10.1016/j.virol.2017.03.019
5. Lau, S.K.; Woo, P.C.; Li, K.S.; Huang, Y.; Tsoi, H.W.; Wong, B.H.; Wong, S.S.; Leung, S.Y.; Chan, K.H.; Yuen, K.Y. Severe acute respiratory syndrome coronavirus-like virus in Chinese horseshoe bats. *Proc. Natl. Acad. Sci. U.S.A.*, **2005**, *102*, 14040-14045. doi:10.1073/pnas.0506735102
6. Xu, L.; Zhang, F.; Yang, W.; Jiang, T.; Lu, G.; He, B.; Li, X.; Hu, T.; Chen, G.; Feng, Y.; et al. Detection and characterization of diverse alpha- and betacoronaviruses from bats in China. *Virol. Sin.*, **2016**, *31*, 69-77. doi:10.1007/s12250-016-3727-3
7. Ge, X.Y.; Li, J.L.; Yang, X.L.; Chmura, A.A.; Zhu, G.; Epstein, J.H.; Mazet, J.K.; Hu, B.; Zhang, W.; Peng, C.; et al. Isolation and characterization of a bat SARS-like coronavirus that uses the ACE2 receptor. *Nature*, **2013**, *503*, 535-538. doi:10.1038/nature12711

8. He, B.; Zhang, Y.; Xu, L.; Yang, W.; Yang, F.; Feng, Y.; Xia, L.; Zhou, J.; Zhen, W.; Feng, Y.; et al. Identification of diverse alphacoronaviruses and genomic characterization of a novel severe acute respiratory syndrome-like coronavirus from bats in China. *J. Virol.*, **2014**, *88*, 7070-7082. doi:10.1128/JVI.00631-14
9. Hu, B.; Zeng, L.P.; Yang, X.L.; Ge, X.Y.; Zhang, W.; Li, B.; Xie, J.Z.; Shen, X.R.; Zhang, Y.Z.; Wang, N.; et al. Discovery of a rich gene pool of bat SARS-related coronaviruses provides new insights into the origin of SARS coronavirus. *PLoS Pathog.*, **2017**, *13*, e1006698. doi:10.1371/journal.ppat.1006698
10. Lau, S.K.; Feng, Y.; Chen, H.; Luk, H.K.; Yang, W.H.; Li, K.S.; Zhang, Y.Z.; Huang, Y.; Song, Z.Z.; Chow, W.N.; et al. Severe Acute Respiratory Syndrome (SARS) Coronavirus ORF8 Protein Is Acquired from SARS-Related Coronavirus from Greater Horseshoe Bats through Recombination. *J. Virol.*, **2015**, *89*, 10532-10547. doi:10.1128/JVI.01048-15
11. Wang, L.; Fu, S.; Cao, Y.; Zhang, H.; Feng, Y.; Yang, W.; Nie, K.; Ma, X.; Liang, G. Discovery and genetic analysis of novel coronaviruses in least horseshoe bats in southwestern China. *Emerg. microbes & infect.*, **2017**, *6*, e14. doi:10.1038/emi.2016.140
12. Hu, D.; Zhu, C.; Ai, L.; He, T.; Wang, Y.; Ye, F.; Yang, L.; Ding, C.; Zhu, X.; Lv, R.; et al. Genomic characterization and infectivity of a novel SARS-like coronavirus in Chinese bats. *Emerg. microbes & infect.*, **2018**, *7*, 154. doi:10.1038/s41426-018-0155-5
13. Lee, S.; Jo, S.D.; Son, K.; An, I.; Jeong, J.; Wang, S.J.; Kim, Y.; Jheong, W.; Oem, J.K. Genetic Characteristics of Coronaviruses from Korean Bats in 2016. *Microb. Ecol.*, **2018**, *75*, 174-182. doi:10.1007/s00248-017-1033-8
14. Kim, Y.; Son, K.; Kim, Y.S.; Lee, S.Y.; Jheong, W.; Oem, J.K. Complete genome analysis of a SARS-like bat coronavirus identified in the Republic of Korea. *Virus genes*, **2019**, *55*, 545-549. doi:10.1007/s11262-019-01668-w
