# Supplementary material for: The Ecological Niche of SARS-CoV-2-like Viruses in Bats, as Inferred from Phylogeographic Analyses of Rhinolophus Species
Source: Preprints.org preprint supplement (doi:10.20944/preprints202103.0409.v1), 2021-03-16
Supplement: Supplementary file 4 [file supplementary]

**Table S1. Cytochrome c oxidase subunit 1 (COI) haplotypes of *Rhinolophus* species analysed in this study.**

| Species              | Sample codes /GenBank accessions                                                       | Haplotypes | Country   | Location                                           | Code | Latitude | Longitude | References  | EN datasets          |
|----------------------|----------------------------------------------------------------------------------------|------------|-----------|----------------------------------------------------|------|----------|-----------|-------------|----------------------|
| <i>R. acuminatus</i> | 21445, 21446                                                                           | Rac1       | Cambodia  | Krong Preah Vihear                                 | C2   | 13.7641  | 104.8592  | This study  | 20 points, 30 points |
| <i>R. acuminatus</i> | 23492                                                                                  | Rac1       | Cambodia  | near Kok Lak, Rattanakiri                          | C4   | 14.0186  | 106.7484  | This study  | 20 points, 30 points |
| <i>R. acuminatus</i> | CPV10-535, CPV10-540, CPV10-547                                                        | Rac1       | Cambodia  | Virachey                                           | C5   | 14.2032  | 107.0050  | This study  | 20 points, 30 points |
| <i>R. acuminatus</i> | 21487                                                                                  | Rac1       | Cambodia  | Mondolkiri                                         | C6   | 12.1803  | 106.9819  | This study  | 20 points, 30 points |
| <i>R. acuminatus</i> | 21463, 21464, 21488                                                                    | Rac2       | Cambodia  | Mondolkiri                                         | C6   | 12.1803  | 106.9819  | This study  | 20 points, 30 points |
| <i>R. acuminatus</i> | HM541312, HM541313, HM541317, HM541318                                                 | Rac1       | Laos      | Dong Hua Sao                                       | L10  | 14.8220  | 106.0600  | [1]         | 20 points, 30 points |
| <i>R. acuminatus</i> | HM541319, HM541320, HM541321, HM541322, HM541323, HM541324, HM541314                   | Rac1       | Laos      | Dong Kanthung                                      | L11  | 14.1750  | 105.5750  | [1]         | 20 points, 30 points |
| <i>R. acuminatus</i> | HM541315                                                                               | Rac6       | Laos      | Dong Hua Sao                                       | L10  | 14.8220  | 106.0600  | [1]         | 30 points            |
| <i>R. acuminatus</i> | HM541310, HM541311                                                                     | Rac3       | Malaysia  | Tabin                                              | M5   | 5.0830   | 118.6670  | [1]         |                      |
| <i>R. acuminatus</i> | SRR13380249, SRR13380251                                                               | Rac1       | Thailand  | Khao Ang Rue Nai                                   | T4   | 13.2067  | 101.7119  | [2]         | 20 points, 30 points |
| <i>R. acuminatus</i> | SRR13380250                                                                            | Rac2       | Thailand  | Khao Ang Rue Nai                                   | T4   | 13.2067  | 101.7119  | [2]         | 20 points, 30 points |
| <i>R. acuminatus</i> | SRR13380247                                                                            | Rac4       | Thailand  | Khao Ang Rue Nai                                   | T4   | 13.2067  | 101.7119  | [2]         | 20 points, 30 points |
| <i>R. acuminatus</i> | SRR13380248                                                                            | Rac5       | Thailand  | Khao Ang Rue Nai                                   | T4   | 13.2067  | 101.7119  | [2]         | 20 points, 30 points |
| <i>R. acuminatus</i> | HM541316                                                                               | Rac1       | Vietnam   | Yok Don NP                                         | V13  | 12.8670  | 107.7000  | [1]         | 20 points, 30 points |
| <i>R. acuminatus</i> | HM914924, HM914925                                                                     | Rac1       | Vietnam   | Bu Gia Map                                         | V14  | 12.1940  | 107.2060  | [2]         |                      |
| <i>R. acuminatus</i> | HM541325, HM914901, HM914902, HM914913, HM914914                                       | Rac1       | Vietnam   | Cat Tien                                           | V17  | 11.4170  | 107.4330  | [1]         | 20 points, 30 points |
| <i>R. affinis</i>    | CPV10-1, CPV10-5, CPV10-12, CPV10-13, CPV10-15, CPV10-25, CPV10-31, CPV10-46, CPV10-53 | Ra1        | Cambodia  | Preah Vihear Temple                                | C1   | 14.3594  | 104.7859  | This study  |                      |
| <i>R. affinis</i>    | CPV10-357, CPV10-394, CPV10-418                                                        | Ra1        | Cambodia  | Virachey                                           | C5   | 14.2032  | 107.0050  | This study  |                      |
| <i>R. affinis</i>    | CPV10-361, CPV10-370                                                                   | Ra2        | Cambodia  | Virachey                                           | C5   | 14.2032  | 107.0050  | This study  |                      |
| <i>R. affinis</i>    | CPV10-366, CPV10-389, CPV10-391, CPV10-397, CPV10-401, CPV10-410, CPV10-417            | Ra3        | Cambodia  | Virachey                                           | C5   | 14.2032  | 107.0050  | This study  | 30 points            |
| <i>R. affinis</i>    | CPV10-385                                                                              | Ra4        | Cambodia  | Virachey                                           | C5   | 14.2032  | 107.0050  | This study  |                      |
| <i>R. affinis</i>    | HM541383, HM541387                                                                     | Ra3        | China     | Guangxi, Jing Xin County Provincial Nature Reserve | Ch4  | 23.1170  | 105.9670  | [1]         | 30 points            |
| <i>R. affinis</i>    | HM541347, HM541348, HM541353                                                           | Ra3        | China     | Guangxi, Shiwandashan National Reserve             | Ch5  | 21.8460  | 107.8890  | [1]         | 30 points            |
| <i>R. affinis</i>    | SRR11085797                                                                            | Ra5        | China     | Mojiang                                            | Ch1  | 23.4319  | 101.6924  | [3]         | 20 points, 30 points |
| <i>R. affinis</i>    | HM541342, HM541343-6, HM541377-82, HM541384-6, HM541388-90, HM541392-4                 | Ra6        | China     | Guangxi, Jing Xin County Provincial Nature Reserve | Ch4  | 23.1170  | 105.9670  | [1]         |                      |
| <i>R. affinis</i>    | HM541349, HM541350-2, HM541354-9, HM541368-76                                          | Ra6        | China     | Guangxi, Shiwandashan National Reserve             | Ch5  | 21.8460  | 107.8890  | [1]         |                      |
| <i>R. affinis</i>    | HM541391                                                                               | Ra7        | China     | Guangxi, Jing Xin County Provincial Nature Reserve | Ch4  | 23.1170  | 105.9670  | [1]         |                      |
| <i>R. affinis</i>    | JF444035                                                                               | Ra8        | China     | Shuhuangshan Reserve                               | Ch6  | 26.4167  | 111.0330  | unpublished |                      |
| <i>R. affinis</i>    | KP192694                                                                               | Ra16       | Indonesia | Sumatra                                            | I1   | -4.5597  | 105.4068  | [4]         |                      |
| <i>R. affinis</i>    | KP192693                                                                               | Ra17       | Indonesia | Sumatra                                            | I1   | -4.5597  | 105.4068  | [4]         |                      |

|                   |                                              |      |          |                                     |     |         |          |                                    |           |
|-------------------|----------------------------------------------|------|----------|-------------------------------------|-----|---------|----------|------------------------------------|-----------|
| <i>R. affinis</i> | HM541335                                     | Ra1  | Laos     | Dong Hua Sao                        | L10 | 14.8220 | 106.0600 | [1]                                | 30 points |
| <i>R. affinis</i> | HM541336, HM541341                           | Ra10 | Laos     | Xiangkhoang, Nam Et<br>NBCA         | L2  | 20.0730 | 103.4330 | [1]                                |           |
| <i>R. affinis</i> | HM541339, HM541340                           | Ra3  | Laos     | LouangNamtha                        | L1  | 20.7360 | 101.1670 | [1]                                |           |
| <i>R. affinis</i> | HM541334                                     | Ra3  | Laos     | Dong Hua Sao                        | L10 | 14.8220 | 106.0600 | [1]                                |           |
| <i>R. affinis</i> | HM541366, HM541367                           | Ra3  | Laos     | TakLeuk                             | L5  | 18.3830 | 103.0670 | [1]                                |           |
| <i>R. affinis</i> | HM541333                                     | Ra3  | Laos     | Attapeu                             | L9  | 14.9500 | 107.1330 | [1]                                |           |
| <i>R. affinis</i> | HM541365                                     | Ra9  | Laos     | TakLeuk                             | L5  | 18.3830 | 103.0670 | [1]                                |           |
| <i>R. affinis</i> | HM541337, HM541338                           | Ra11 | Malaysia | Cameron Highlands                   | M1  | 4.4600  | 101.3800 | [1]                                |           |
| <i>R. affinis</i> | HM541330                                     | Ra11 | Malaysia | Kuala Lompat                        | M2  | 3.7170  | 102.1670 | [1]                                |           |
| <i>R. affinis</i> | HM541331, HM541332                           | Ra11 | Malaysia | Pasoh Forest                        | M3  | 2.9670  | 102.3000 | [1]                                |           |
| <i>R. affinis</i> | HM541411, HM541412, HM541413,<br>HM541407-10 | Ra11 | Malaysia | Endau Rompin                        | M4  | 2.5330  | 103.4000 | [1]                                | 30 points |
| <i>R. affinis</i> | HM541414                                     | Ra12 | Malaysia | Endau Rompin                        | M4  | 2.5330  | 103.4000 | [1]                                |           |
| <i>R. affinis</i> | MK410386                                     | Ra13 | Myanmar  | Chin                                | B1  | 22.8065 | 93.6998  | [5]                                |           |
| <i>R. affinis</i> | HM541326                                     | Ra14 | Myanmar  | Nyaungshwe                          | B5  | 20.6630 | 96.9670  | [1]                                |           |
| <i>R. affinis</i> | KP192682                                     | Ra15 | Myanmar  | Kadan                               | B6  | 12.4739 | 98.4032  | [4]                                |           |
| <i>R. affinis</i> | KY034102, KY034135                           | Ra1  | Thailand | Loei                                | T2  | 17.5050 | 100.9380 | unpublished                        |           |
| <i>R. affinis</i> | KP192677, KP192678                           | Ra11 | Thailand | Khuan Kalong                        | T5  | 7.0129  | 100.0210 | [4]                                |           |
| <i>R. affinis</i> | KY034109                                     | Ra11 | Thailand | Songkla                             | T6  | 6.9940  | 100.1490 | unpublished                        |           |
| <i>R. affinis</i> | KP192673, KP192675, KP192676                 | Ra11 | Thailand | Hala Bala                           | T7  | 5.7983  | 101.8250 | [4]                                |           |
| <i>R. affinis</i> | KY034138                                     | Ra18 | Thailand | Loei                                | T2  | 17.5050 | 100.9380 | unpublished                        |           |
| <i>R. affinis</i> | KP192689, KP192690, KP192691                 | Ra19 | Thailand | Adang                               | T6  | 6.5146  | 99.3173  | [4]                                | 30 points |
| <i>R. affinis</i> | KY034134                                     | Ra20 | Thailand | Songkla                             | T6  | 6.9940  | 100.1490 | unpublished                        |           |
| <i>R. affinis</i> | KP192687, KP192688                           | Ra21 | Thailand | Chieng Mai                          | T1  | 19.5093 | 98.8326  | [4]                                |           |
| <i>R. affinis</i> | KP192679, KP192680, KP192681                 | Ra22 | Thailand | KhuanKalong                         | T5  | 7.0129  | 100.0210 | [4]                                |           |
| <i>R. affinis</i> | KP192692, KY034116, KY034119                 | Ra22 | Thailand | Adang                               | T6  | 6.5146  | 99.3173  | [4]                                |           |
| <i>R. affinis</i> | KP192674                                     | Ra23 | Thailand | Hala Bala                           | T7  | 5.7983  | 101.8250 | [4]                                |           |
| <i>R. affinis</i> | HM541360                                     | Ra1  | Vietnam  | Ngoc Linh, Quang Nam                | V11 | 15.2088 | 107.7395 | [1]                                |           |
| <i>R. affinis</i> | HM541363                                     | Ra1  | Vietnam  | Cat Tien                            | V17 | 11.4170 | 107.4330 | [1]                                |           |
| <i>R. affinis</i> | 22716                                        | Ra1  | Vietnam  | Huong Hoa                           | V9  | 16.9370 | 106.5810 | This study                         |           |
| <i>R. affinis</i> | VN11-1112, VN11-1114, HM541399,<br>HQ580330  | Ra24 | Vietnam  | Tram Ton, Sapa                      | V1  | 22.3278 | 103.7792 | This study,<br>[1],<br>unpublished |           |
| <i>R. affinis</i> | VN11-152                                     | Ra25 | Vietnam  | Hanoi, Ba Vi National<br>park       | V4  | 21.0830 | 105.3730 | This study                         | 30 points |
| <i>R. affinis</i> | VN11-153, VN11-154, VN11-160                 | Ra26 | Vietnam  | Hanoi, Ba Vi National<br>park       | V4  | 21.0830 | 105.3730 | This study                         |           |
| <i>R. affinis</i> | VN11-1239, HM541402                          | Ra27 | Vietnam  | Ngoc Linh, Kon Tum                  | V11 | 15.2088 | 107.7395 | This study,<br>[1]                 |           |
| <i>R. affinis</i> | VN11-1241                                    | Ra28 | Vietnam  | Ngoc Linh, Kon Tum                  | V11 | 15.2088 | 107.7395 | This study                         |           |
| <i>R. affinis</i> | VN1765                                       | Ra29 | Vietnam  | Kon Tum, Chu Mom Ray                | V12 | 14.4250 | 107.7860 | This study                         |           |
| <i>R. affinis</i> | 21936                                        | Ra3  | Vietnam  | Dakrong                             | V10 | 16.6000 | 106.8667 | This study                         |           |
| <i>R. affinis</i> | KP192684                                     | Ra3  | Vietnam  | Vinh Phuc, Tam Dao<br>National Park | V2  | 21.5075 | 105.6082 | [6]                                |           |
| <i>R. affinis</i> | VN11-167, T5004, VN11-175                    | Ra3  | Vietnam  | Hanoi, Ba Vi National<br>park       | V4  | 21.0830 | 105.3730 | This study                         |           |

|                     |                                                                                                    |      |          |                                    |     |         |          |                  |                      |
|---------------------|----------------------------------------------------------------------------------------------------|------|----------|------------------------------------|-----|---------|----------|------------------|----------------------|
| <i>R. affinis</i>   | VN11-0493                                                                                          | Ra3  | Vietnam  | Thanh Hoa, Ba Thuoc                | V5  | 20.4600 | 105.2520 | This study       | 30 points            |
| <i>R. affinis</i>   | VN11-0463                                                                                          | Ra3  | Vietnam  | Thanh Hoa, Pu Luong Nature Reserve | V6  | 20.3050 | 105.0120 | This study       | 30 points            |
| <i>R. affinis</i>   | VN11-008, VN11-033, VN11-041, VN11-042                                                             | Ra3  | Vietnam  | Vu Quang                           | V8  | 18.3200 | 105.4360 | This study       | 30 points            |
| <i>R. affinis</i>   | 22720, 22709, 22708                                                                                | Ra3  | Vietnam  | Huong Hoa                          | V9  | 16.9370 | 106.5810 | This study       | 30 points            |
| <i>R. affinis</i>   | HM541398, HQ580331                                                                                 | Ra30 | Vietnam  | Sapa, Hoang Lien NP                | V1  | 22.3278 | 103.7792 | [1], unpublished |                      |
| <i>R. affinis</i>   | HM541364                                                                                           | Ra31 | Vietnam  | Lao Cai, Ta Phinh                  | V1  | 22.3278 | 103.7792 | [1]              |                      |
| <i>R. affinis</i>   | KP192683                                                                                           | Ra32 | Vietnam  | Vinh Phuc, Tam Dao National Park   | V2  | 21.5075 | 105.6082 | [4]              |                      |
| <i>R. affinis</i>   | VN11-1180, HM541395, HM541401                                                                      | Ra33 | Vietnam  | Ngoc Linh, Quang Nam               | V11 | 15.2088 | 107.7395 | [1]              |                      |
| <i>R. affinis</i>   | GU684791, GU684792-4, GU684798, GU684801, HM541327                                                 | Ra34 | Vietnam  | Bi Doup-Nui Ba                     | V15 | 12.1790 | 108.6790 | [1], unpublished |                      |
| <i>R. affinis</i>   | HM541396                                                                                           | Ra35 | Vietnam  | Xuan Truong                        | V16 | 11.8670 | 108.5500 | [1]              |                      |
| <i>R. affinis</i>   | HM541361                                                                                           | Ra36 | Vietnam  | Cat Tien                           | V17 | 11.4170 | 107.4330 | [1]              |                      |
| <i>R. affinis</i>   | HM541362                                                                                           | Ra37 | Vietnam  | Cat Tien                           | V17 | 11.4170 | 107.4330 | [1]              |                      |
| <i>R. affinis</i>   | HM541328                                                                                           | Ra38 | Vietnam  | Vu Quang                           | V8  | 18.3200 | 105.4360 | [1]              |                      |
| <i>R. affinis</i>   | HM541329                                                                                           | Ra39 | Vietnam  | Vu Quang                           | V8  | 18.3200 | 105.4360 | [1]              |                      |
| <i>R. affinis</i>   | KP192685, KP192686                                                                                 | Ra6  | Vietnam  | Vinh Phuc, Tam Dao National Park   | V2  | 21.5075 | 105.6082 | [4]              |                      |
| <i>R. affinis</i>   | VN11-1101                                                                                          | Ra6  | Vietnam  | Phu Tho, Xuan Son                  | V3  | 21.1386 | 104.9399 | This study       |                      |
| <i>R. affinis</i>   | VN11-150, VN11-158, VN11-159, VN11-166, VN11-170, VN11-182, VN11-183, VN11-185, VN11-187, VN11-190 | Ra6  | Vietnam  | Hanoi, Ba Vi National park         | V4  | 21.0830 | 105.3730 | This study       |                      |
| <i>R. malayanus</i> | CPV10-153                                                                                          | Rm1  | Cambodia | Preah Vihear Temple                | C1  | 14.3594 | 104.7859 | This study       |                      |
| <i>R. malayanus</i> | 23405                                                                                              | Rm2  | Cambodia | Krong Preah Vihear                 | C2  | 13.7641 | 104.8592 | This study       |                      |
| <i>R. malayanus</i> | 21705                                                                                              | Rm3  | Cambodia | Kampot                             | C8  | 10.5597 | 104.2822 | This study       |                      |
| <i>R. malayanus</i> | MK900704, MK900705                                                                                 | Rm4  | China    | Yunnan                             | Ch2 | 21.8896 | 101.2979 | [7]              | 20 points, 30 points |
| <i>R. malayanus</i> | SRR12432009                                                                                        | Rm4  | China    | Mengla County                      | Ch3 | 21.9189 | 101.2716 | [8]              | 20 points, 30 points |
| <i>R. malayanus</i> | MK900706                                                                                           | Rm5  | China    | Yunnan                             | Ch2 | 21.8896 | 101.2979 | [7]              |                      |
| <i>R. malayanus</i> | HM541621                                                                                           | Rm10 | Laos     | Hin Nam No                         | L8  | 17.5670 | 105.8330 | [1]              |                      |
| <i>R. malayanus</i> | HM541622                                                                                           | Rm11 | Laos     | Hin Nam No                         | L8  | 17.5670 | 105.8330 | [1]              |                      |
| <i>R. malayanus</i> | HM541610                                                                                           | Rm12 | Laos     | Dong Hua Sao                       | L10 | 14.8220 | 106.0600 | [1]              |                      |
| <i>R. malayanus</i> | HM541606, HM541607, HM541608, HM541609                                                             | Rm2  | Laos     | Attapeu                            | L9  | 14.9500 | 107.1330 | [1]              |                      |
| <i>R. malayanus</i> | HM541613                                                                                           | Rm4  | Laos     | LouangNamtha                       | L1  | 20.7360 | 101.1670 | [1]              | 20 points, 30 points |
| <i>R. malayanus</i> | LNK214                                                                                             | Rm4  | Laos     | Nam Khan                           | L3  | 19.6823 | 102.3377 | This study       | 20 points, 30 points |
| <i>R. malayanus</i> | HM541614, HM541615, HM541616                                                                       | Rm6  | Laos     | TakLeuk                            | L5  | 18.3830 | 103.0670 | [1]              | 30 points            |
| <i>R. malayanus</i> | HM541619                                                                                           | Rm7  | Laos     | TakLeuk                            | L5  | 18.3830 | 103.0670 | [1]              |                      |
| <i>R. malayanus</i> | HM541620                                                                                           | Rm8  | Laos     | TakLeuk                            | L5  | 18.3830 | 103.0670 | [1]              |                      |
| <i>R. malayanus</i> | HM541618                                                                                           | Rm9  | Laos     | Ban Pomkhoun-Phonsong              | L7  | 17.6330 | 104.9500 | [1]              |                      |
| <i>R. malayanus</i> | HM541624, HM541617, HM541623                                                                       | Rm9  | Laos     | Hin Nam No                         | L8  | 17.5670 | 105.8330 | [1]              |                      |
| <i>R. malayanus</i> | KX099327, KX099330                                                                                 | Rm13 | Myanmar  | NA                                 | B2  | 22.0476 | 95.9993  | [9]              |                      |
| <i>R. malayanus</i> | HM541612                                                                                           | Rm13 | Myanmar  | NA                                 | B3  | 22.1000 | 96.6200  | [1]              |                      |
| <i>R. malayanus</i> | KX099328, KX099329                                                                                 | Rm14 | Myanmar  | NA                                 | B2  | 22.0476 | 95.9993  | [9]              |                      |

|                     |                                                                                                                                                                                                                                                                                                                               |      |          |                     |     |         |          |                  |                      |
|---------------------|-------------------------------------------------------------------------------------------------------------------------------------------------------------------------------------------------------------------------------------------------------------------------------------------------------------------------------|------|----------|---------------------|-----|---------|----------|------------------|----------------------|
| <i>R. malayanus</i> | KX099331                                                                                                                                                                                                                                                                                                                      | Rm15 | Myanmar  | NA                  | B2  | 22.0476 | 95.9993  | [9]              |                      |
| <i>R. malayanus</i> | KX099332                                                                                                                                                                                                                                                                                                                      | Rm16 | Myanmar  | NA                  | B2  | 22.0476 | 95.9993  | [9]              |                      |
| <i>R. malayanus</i> | HM541611                                                                                                                                                                                                                                                                                                                      | Rm17 | Myanmar  | NA                  | B4  | 22.4690 | 96.9930  | [1]              |                      |
| <i>R. malayanus</i> | 18252                                                                                                                                                                                                                                                                                                                         | Rm19 | Thailand | Kanchanaburi        | T3  | 14.4500 | 98.8500  | This study       |                      |
| <i>R. malayanus</i> | VN11-1271, T5041, T5039, 21919, 21927, 22727                                                                                                                                                                                                                                                                                  | Rm1  | Vietnam  | Dakrong             | V10 | 16.6000 | 106.8667 | This study       |                      |
| <i>R. malayanus</i> | VN11-0413                                                                                                                                                                                                                                                                                                                     | Rm1  | Vietnam  | Ngoc Lac            | V7  | 20.0944 | 105.3797 | This study       |                      |
| <i>R. malayanus</i> | 22715                                                                                                                                                                                                                                                                                                                         | Rm1  | Vietnam  | Huong Hoa           | V9  | 16.9370 | 106.5810 | This study       |                      |
| <i>R. malayanus</i> | 22726                                                                                                                                                                                                                                                                                                                         | Rm2  | Vietnam  | Dakrong             | V10 | 16.6000 | 106.8667 | This study       |                      |
| <i>R. malayanus</i> | HM541604                                                                                                                                                                                                                                                                                                                      | Rm20 | Vietnam  | Phu Quoc            | V18 | 10.2000 | 104.0000 | [1]              |                      |
| <i>R. shameli</i>   | CPV10-28, CPV10-146, CPV10-147, CPV10-148, CPV10-149, CPV10-151, CPV10-154, CPV10-155, CPV10-157, CPV10-158                                                                                                                                                                                                                   | Rsh1 | Cambodia | Preah Vihear Temple | C1  | 14.3594 | 104.7859 | This study       | 20 points, 30 points |
| <i>R. shameli</i>   | 21451, 23400                                                                                                                                                                                                                                                                                                                  | Rsh1 | Cambodia | Krong Preah Vihear  | C2  | 13.7641 | 104.8592 | This study       | 20 points, 30 points |
| <i>R. shameli</i>   | CPV10-200, CPV10-201, CPV10-202, CPV10-203, CPV10-210, CPV10-211, CPV10-212, CPV10-214, CPV10-215, CPV10-216, CPV10-217, CPV10-221, CPV10-222, CPV10-223, CPV10-225, CPV10-229, CPV10-230, CPV10-260                                                                                                                          | Rsh1 | Cambodia | Virachey            | C5  | 14.2032 | 107.0050 | This study       | 20 points, 30 points |
| <i>R. shameli</i>   | CPV10-286, CPV10-288, CPV10-290, CPV10-315, CPV10-317, CPV10-318, CPV10-319, CPV10-320, CPV10-321, CPV10-322, CPV10-324, CPV10-325, CPV10-326, CPV10-328, CPV10-329, CPV10-330, CPV10-332, CPV10-333, CPV10-334, CPV10-335, CPV10-339, CPV10-341, CPV10-343, CPV10-346, CPV10-354, CPV10-356, CPV10-407, CPV10-408, CPV10-413 | Rsh1 | Cambodia | Preah Vihear Temple | C1  | 14.3594 | 104.7859 | This study       | 30 points            |
| <i>R. shameli</i>   | CPV10-3                                                                                                                                                                                                                                                                                                                       | Rsh2 | Cambodia | Krong Preah Vihear  | C2  | 13.7641 | 104.8592 | This study       | 30 points            |
| <i>R. shameli</i>   | 23402                                                                                                                                                                                                                                                                                                                         | Rsh3 | Cambodia | KaohKong            | C7  | 11.6390 | 103.5740 | [1]              |                      |
| <i>R. shameli</i>   | HM541778                                                                                                                                                                                                                                                                                                                      | Rsh4 | Cambodia | Kampot              | C8  | 10.5597 | 104.2822 | This study       |                      |
| <i>R. shameli</i>   | 21713, 21714                                                                                                                                                                                                                                                                                                                  | Rsh5 | Cambodia | Dong Hua Sao        | L10 | 14.8220 | 106.0600 | [1]              | 20 points, 30 points |
| <i>R. shameli</i>   | HM541782, HM541783, HM541784, HM541793                                                                                                                                                                                                                                                                                        | Rsh1 | Laos     | Nam Kading          | L4  | 18.8420 | 104.5830 | [1]              | 20 points, 30 points |
| <i>R. shameli</i>   | HM541785                                                                                                                                                                                                                                                                                                                      | Rsh1 | Laos     | Vientiane           | L6  | 18.0830 | 102.6670 | [1]              | 20 points, 30 points |
| <i>R. shameli</i>   | HM541786                                                                                                                                                                                                                                                                                                                      | Rsh1 | Laos     | near Hin Nam No     | L8  | 17.5670 | 105.8330 | [1], unpublished | 20 points, 30 points |
| <i>R. shameli</i>   | HM541780, HM541781, HM541792, JF444101                                                                                                                                                                                                                                                                                        | Rsh1 | Laos     | Attapeu             | L9  | 14.9500 | 107.1330 | [1]              | 20 points, 30 points |
| <i>R. shameli</i>   | HM541788, HM541789, HM541790, HM541791                                                                                                                                                                                                                                                                                        | Rsh1 | Laos     | Attapeu             | L9  | 14.9500 | 107.1330 | [1]              | 20 points, 30 points |
| <i>R. shameli</i>   | HM541787, HM541794                                                                                                                                                                                                                                                                                                            | Rsh6 | Laos     | Dong Kanthung       | L11 | 14.1750 | 105.5750 | [1]              | 30 points            |
| <i>R. shameli</i>   | HM541779                                                                                                                                                                                                                                                                                                                      | Rsh7 | Laos     | near Hin Nam No     | L8  | 17.5670 | 105.8330 | [1]              | 30 points            |
| <i>R. shameli</i>   | HM541777                                                                                                                                                                                                                                                                                                                      | Rsh5 | Vietnam  | PhuQuoc             | V18 | 10.2000 | 104.0000 | [1]              |                      |

## References

1. Francis, C.M.; Borisenko, A.V.; Ivanova, N.V.; Eger, J.L.; Lim, B.K.; Guillen-Servent, A.; Kruskop, S.V.; Mackie, I.; Hebert, P.D. The role of DNA barcodes in understanding and conservation of mammal diversity in southeast Asia. *PLoS ONE*, **2010**, *5*, E12575. doi:10.1371/journal.pone.0012575
2. Wacharapluesadee, S.; Tan, C.W.; Maneeorn, P.; Duengkae, P.; Zhu, F.; Joyjinda, Y.; Kaewpom, T.; Chia, W.N.; Ampoot, W.; Lim, B. L.; et al. Evidence for SARS-CoV-2 related coronaviruses circulating in bats and pangolins in Southeast Asia. *Nat. Commun.*, **2021**, *12*, 972. doi:10.1038/s41467-021-21240-1
3. Zhou, P.; Yang, X.L.; Wang, X.G.; Hu, B.; Zhang, L.; Zhang, W.; Si, H.R.; Zhu, Y.; Li, B.; Huang, C.L.; et al. A pneumonia outbreak associated with a new coronavirus of probable bat origin. *Nature*, **2020**, *579*, 270-273. doi:10.1038/s41586-020-2012-7.
4. Ith, S.; Bumrungsri, S.; Thomas, N.M.; Bates, P.J.J.; Willette, D.A.; Khan, F.A.A.; Wonglapsuwan, M.; Soisook, P.; Maryanto, I.; Huang, J.C.-C.; et al. Geographical Variation of *Rhinolophus affinis* (Chiroptera: Rhinolophidae) in the Sundaic Subregion of Southeast Asia, including the Malay Peninsula, Borneo and Sumatra. *Acta Chiropterol.*, **2016**, *18*, 141–161. doi:10.3161/15081109ACC2016.18.1.006
5. Arai, S.; Kikuchi, F.; Bawm, S.; Son, N.; Lin, K.; Tú, V.; Aoki, K.; Tsuchiya, K.; Tanaka-Taya, K.; Morikawa, S.; et al. Molecular Phylogeny of Mobatviruses (Hantaviridae) in Myanmar and Vietnam. *Viruses*, **2019**, *11*, 228. doi:10.3390/v11030228
6. Ith, S.; Bumrungsri, S.; Furey, N.M.; Bates, P.J.; Wonglapsuwan, M.; Khan, F.; Thong, V.D.; Soisook, P.; Satasook, C.; Thomas, N.M. Taxonomic implications of geographical variation in *Rhinolophus affinis* (Chiroptera: Rhinolophidae) in mainland Southeast Asia. *Zool. Stud.* **2015**, *54*, e31. doi:10.1186/s40555-015-0109-8
7. Liang, J.; He, X.; Peng, X.; Xie, H.; Zhang, L. First record of existence of *Rhinolophus malayanus* (Chiroptera, Rhinolophidae) in China. *Mammalia*, **2020**, *84*, 362-365. doi:10.1515/mammalia-2019-0062
8. Zhou, H.; Chen, X.; Hu, T.; Li, J.; Song, H.; Liu, Y.; Wang, P.; Liu, D.; Yang, J.; Holmes, E.C.; et al. A novel bat coronavirus closely related to SARS-CoV-2 contains natural insertions at the S1/S2 cleavage site of the spike protein. *Curr. Biol.*, **2020**, *30*, 3896. doi:10.1016/j.cub.2020.09.030.
9. Soisook, P.; Karapan, S.; Srikrachang, M.; Dejtaradol, A.; Nualcharoen, K.; Bumrungsri, S.; Oo, S.S.L.; Aung, M.M.; Bates, P.J.J.; Harutyunyan, M.; et al. Hill forest dweller: A new cryptic species of *Rhinolophus* in the ‘pusillus group’ (Chiroptera: Rhinolophidae) from Thailand and Lao PDR. *Acta Chiropt.*, **2016**, *18*, 117-139. doi:10.3161/15081109ACC2016.18.1.005
